# Supplementary material for: Regulation of BRCA1 stability through the tandem UBX domains of isoleucyl-tRNA synthetase 1
Source: PubMed Central journal article supplement (PMC9643514; doi:10.1038/s41467-022-34612-y), 2022-11-08
Supplement: 41467_2022_34612_MOESM1_ESM.pdf [file 41467_2022_34612_MOESM1_ESM.pdf]

## **Supplementary information**

### **Regulation of BRCA1 stability through the tandem UBX domains of isoleucyl-tRNA synthetase 1**

Supplementary Figure 1–11  
Supplementary Note  
Supplementary Methods  
Supplementary Table 1 and 2  
Supplementary References

# Supplementary Figures

**a**

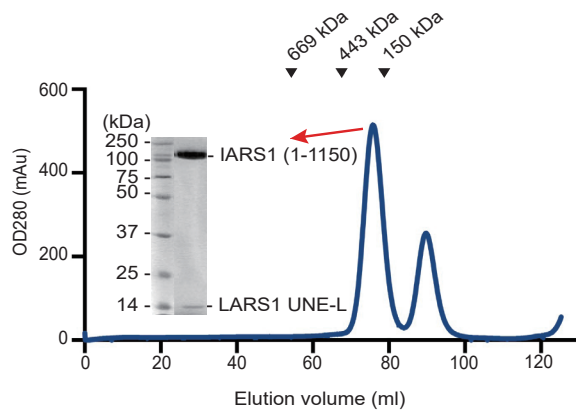

**b**

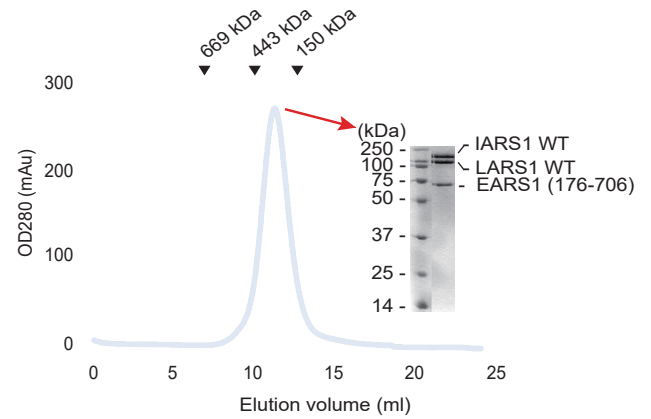

**c**

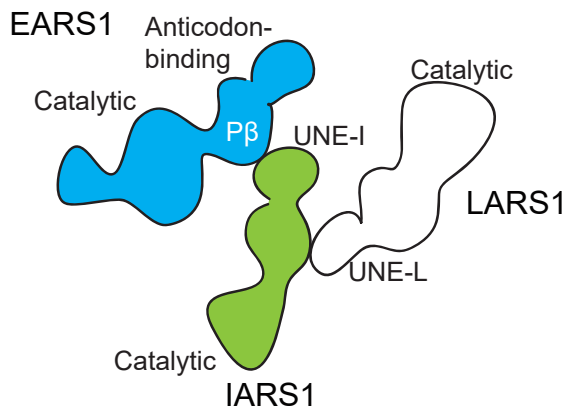

**Supplementary Figure 1 EARS1, IARS1, and LARS1 form a ternary complex. a** A mixture of the UBX2 truncated-IARS1 and LARS1 UNE-L was analyzed by gel filtration. The data are representative of two independent experiments. **b** A mixture of IARS1, LARS1 and the catalytic domain (residues 176–706) of EARS1 was analyzed by gel filtration. The elution positions of standard size markers are indicated by arrowheads. The data are representative of four independent experiments. **a, b** Source data are provided as a Source Data file. **c** A schematic model of the EARS1 (blue), IARS1 (green), and LARS1 (white) ternary complex.

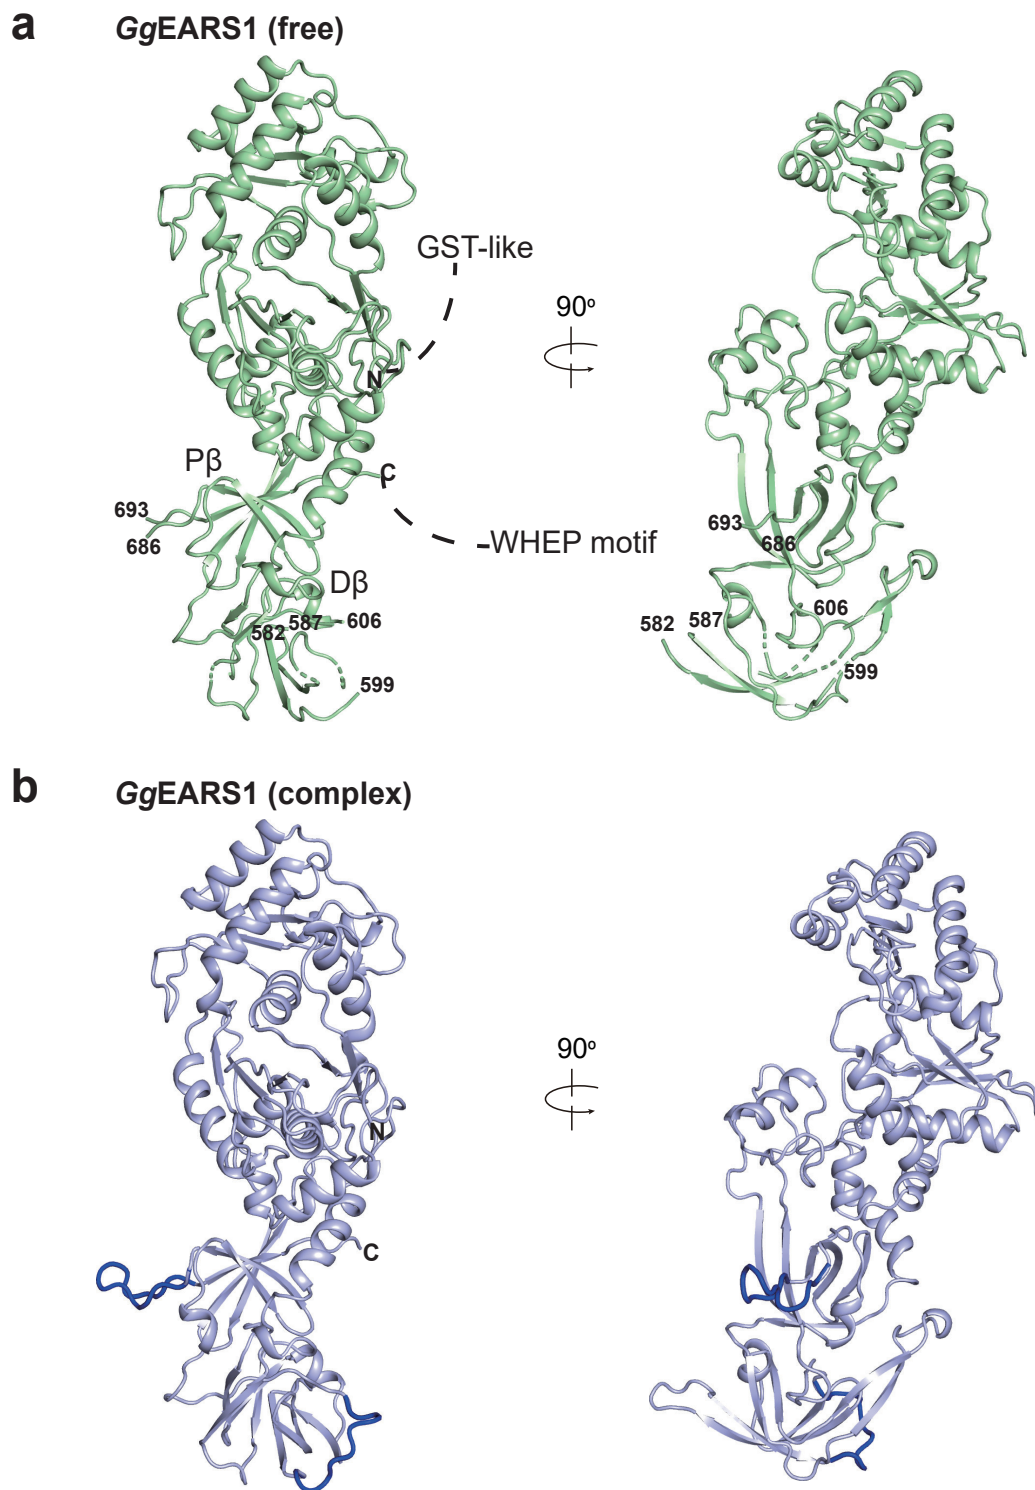

**Supplementary Figure 2 Overall structures of apo *GgEARS1* and EARS1 in the EARS1–IARS1 complex.** **a** The 2.5 Å crystal structure of apo *GgEARS1*. The disordered regions including a hairpin loop (residues 687–692) in the P $\beta$  domain and residues 583–586 and 600–605 in the D $\beta$  domain are labeled. The GST-like domain and WHEP motif linked to the N- and C-terminal ends of EARS1, respectively, are truncated to aid crystallization. **b** Structure of the core domain of *GgEARS1* in the EARS1–IARS1 complex. The disordered regions in the apo *GgEARS1* structure are ordered in the EARS1–IARS1 complex, and shown in blue.

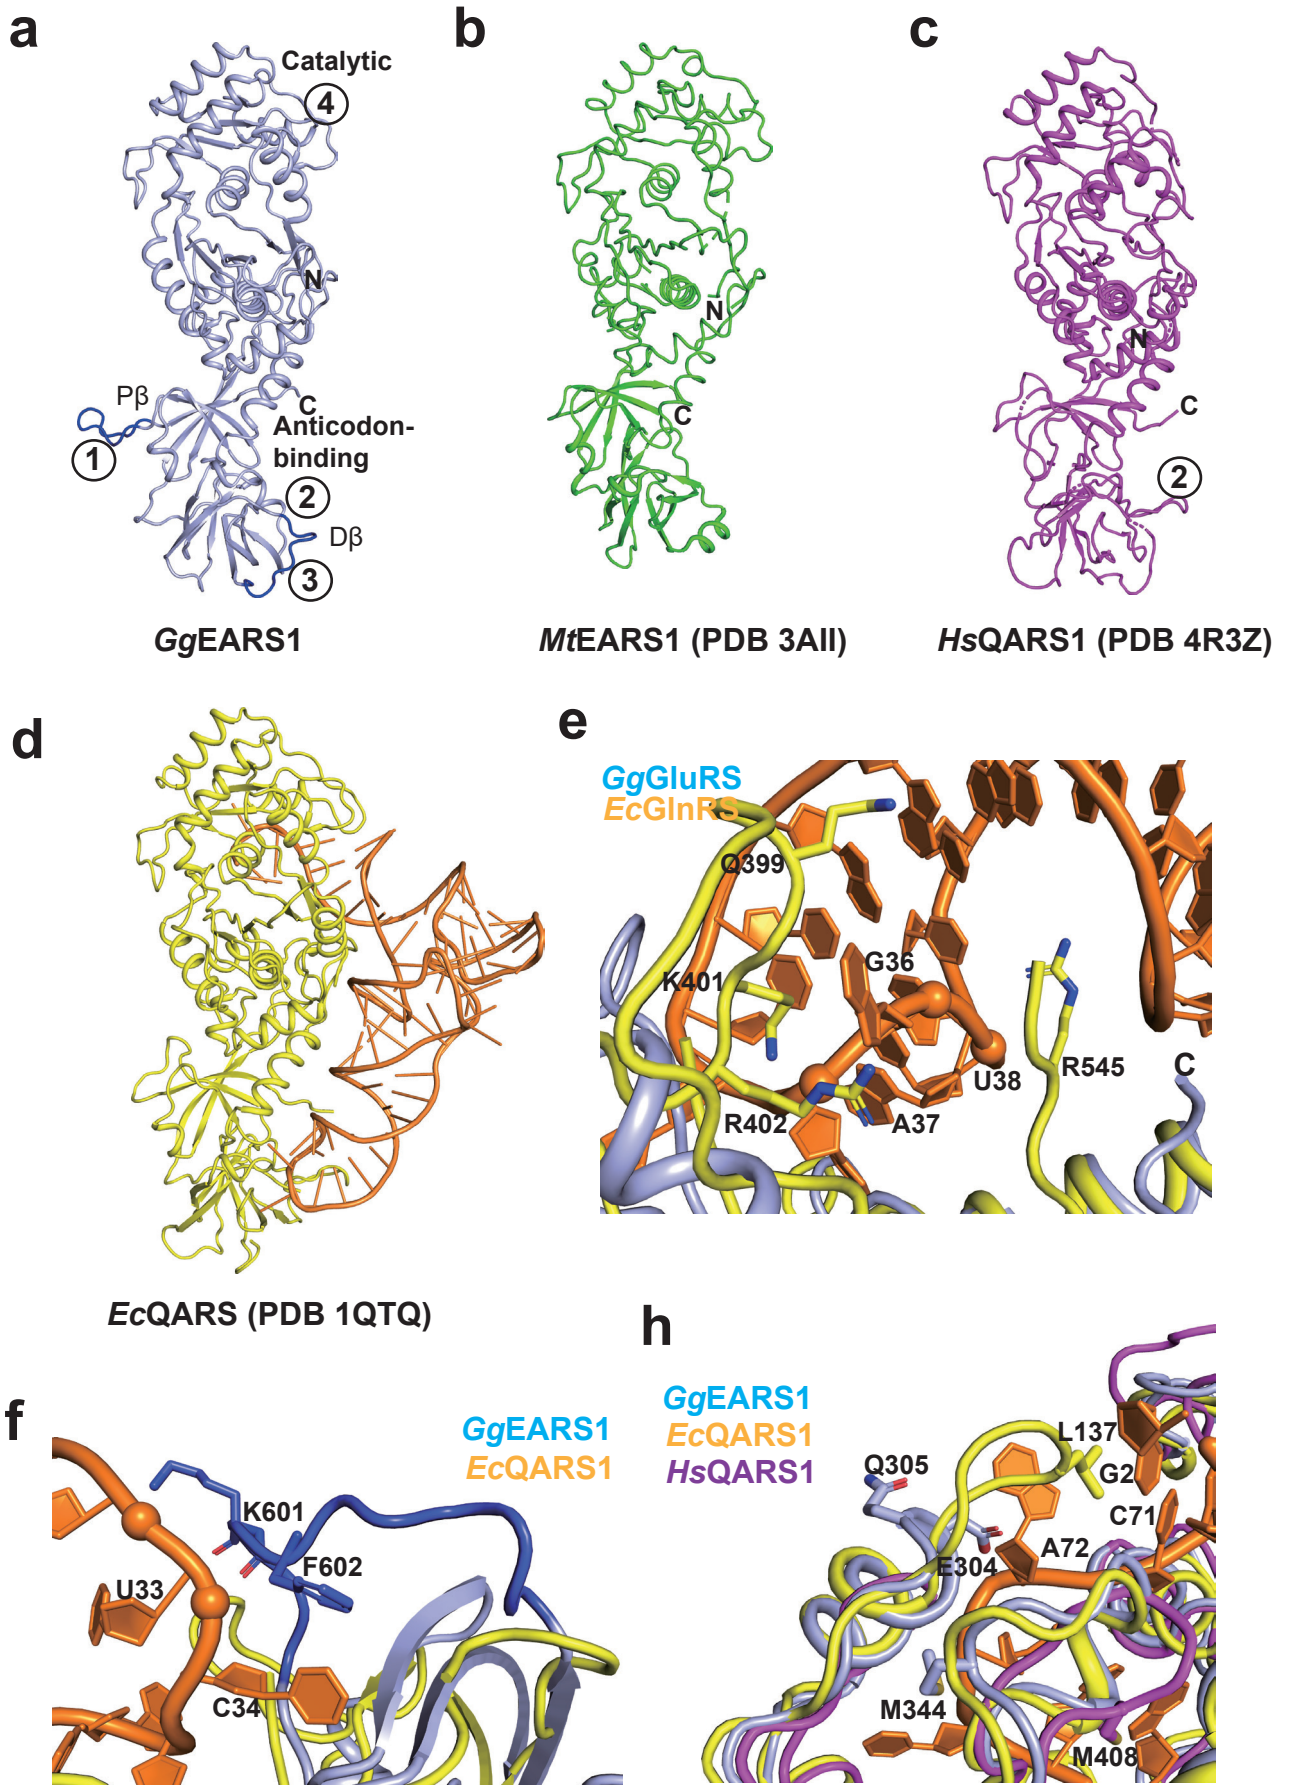

**Supplementary Figure 3 Structural differences between *GgEARS1*, archaeal EARS1 and bacterial and mammalian QARS1s. a** A ribbon representation of the *GgEARS1* structure.

Structural differences between EARS1 and QARS1 in four loops are indicated by circles. **b, c** Structures of EARS1 and QARS1: *M. thermautotrophicus* EARS1 (PDB 3AII<sup>1</sup>, middle; **b**) and *H. sapiens* QARS1 (PDB 4R3Z<sup>2</sup>, right; **c**). **d** A ribbon representation of the *E. coli* QARS1 (yellow)–tRNA complex (PDB 1QTQ<sup>3</sup>). The tRNA<sup>Gln</sup> molecule in the complex is colored orange. **e** Close-up view of the D $\beta$  domain from *Gg*EARS1 (light blue) and *Ec*QARS1 (yellow)–tRNA (orange) complex. Residues in *Gg*EARS1 that could contribute to the binding of tRNA are indicated by ball-and-stick. **f** Close-up view of the tRNA-binding surface from *Gg*EARS1 (light blue) and *Ec*QARS1 (yellow)–tRNA (orange) complex. Residues in *Ec*QARS1 that recognize the anticodon bases are indicated by ball-and-stick. **g** Close-up view of the acceptor arm-binding sites from *Gg*EARS1 (light blue), *Hs*QARS1 (magenta) and *Ec*QARS1 (yellow)–tRNA (orange) complex. Residues in  $\beta$ -turn of *Ec*QARS1 and *Gg*EARS1, or residues in loop S5–H7 of *Gg*EARS1 and *Hs*QARS1 are shown.

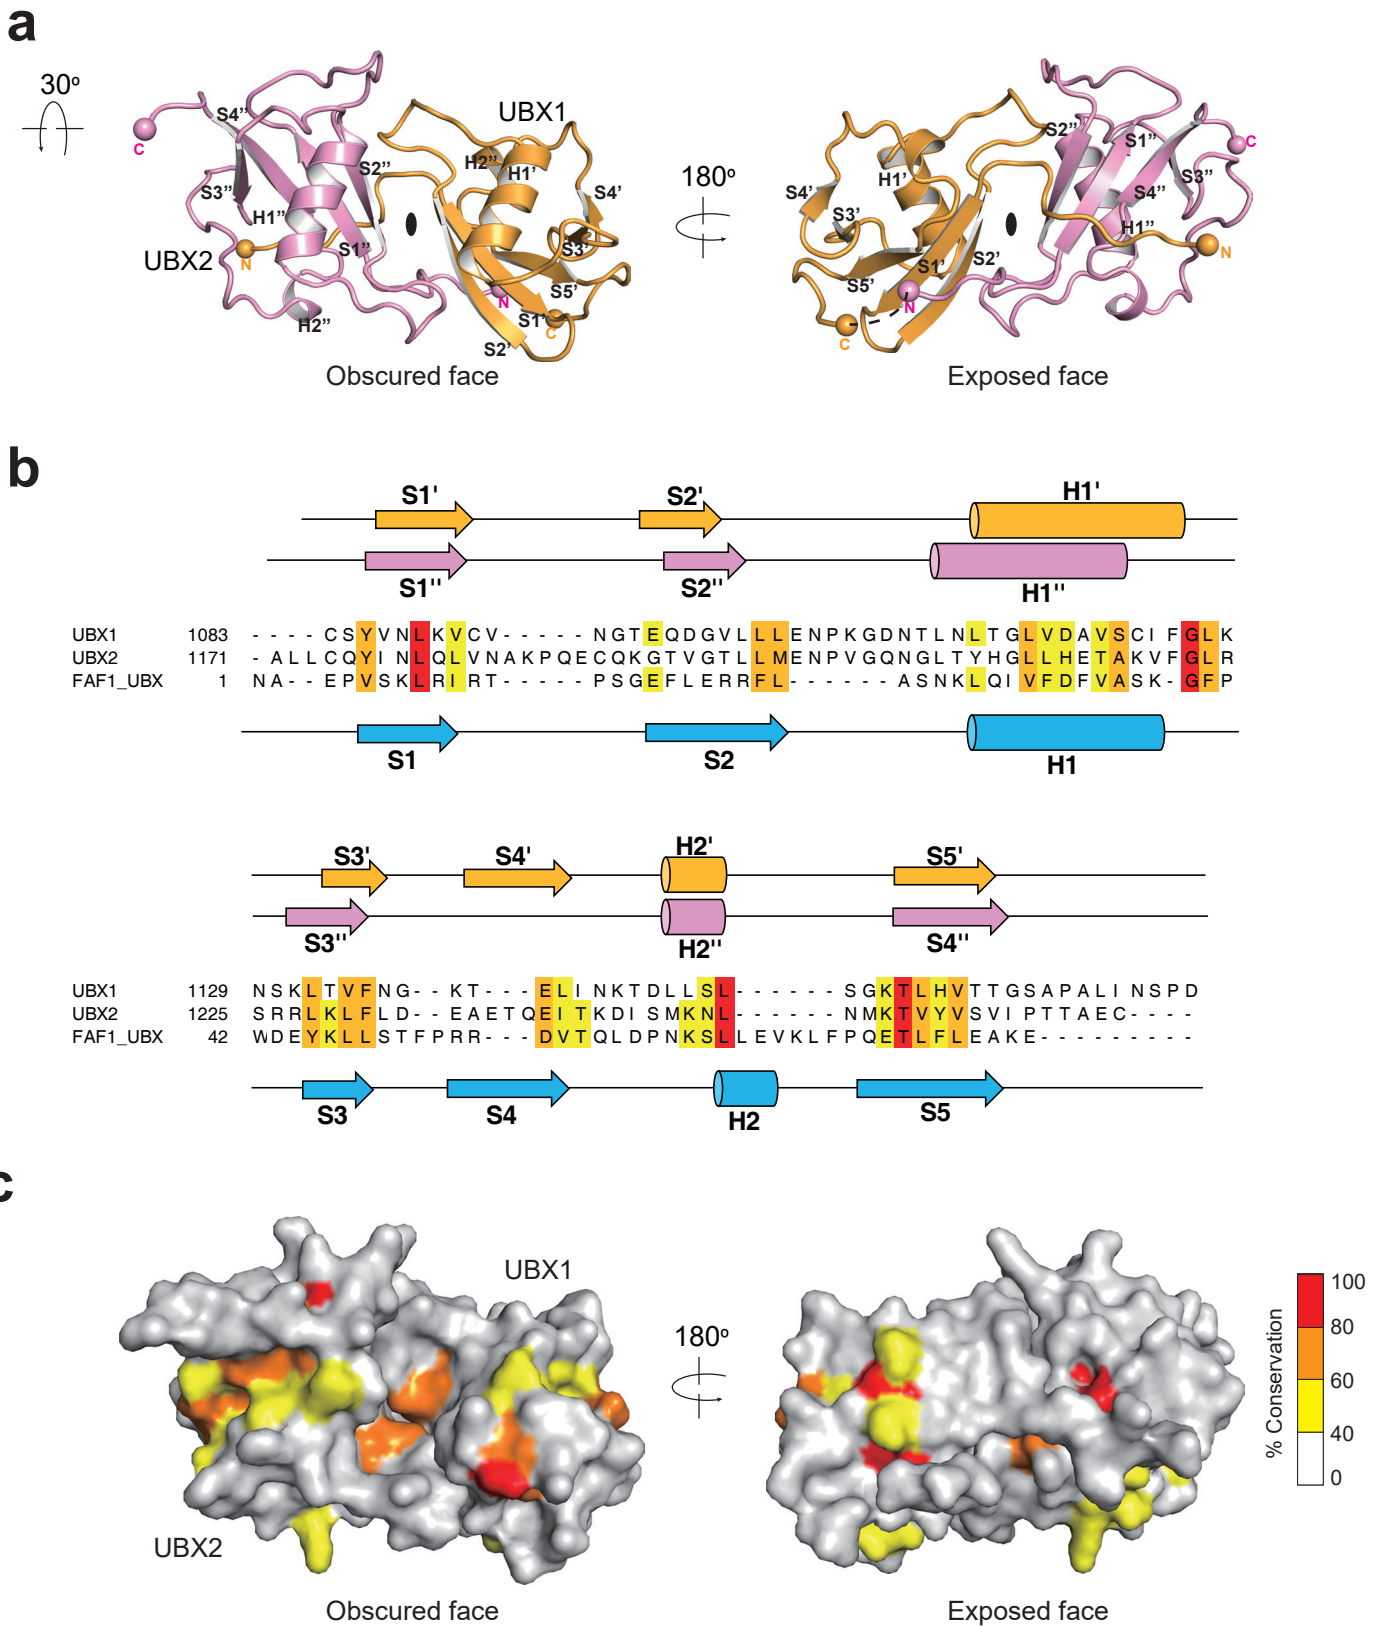

**Supplementary Figure 4 IARS1 UNE-I folds into tandem UBX domains.** a Structure of the UNE-I UBX domains. Both the obscured face and exposed face are shown. The pseudo 2-

fold symmetry axis between UBX1 (orange) and UBX2 (magenta) is shown by a black circle. The dashed line indicates the disordered linker region between UBX1 and UBX2. **b** Structure-based sequence alignments of UBX1, UBX2, and FAS associated factor 1 (FAF1) UBX domain (IPR033043). Strictly conserved residues are colored red, highly conserved residues (80%) are colored orange, and less conserved residues (60%) are colored yellow. The secondary structure is displayed at the top and bottom of the sequence. **c** A surface representation of the UBX domains with the degree of sequence conservation denoted by the same colors as in **b**.

**a**

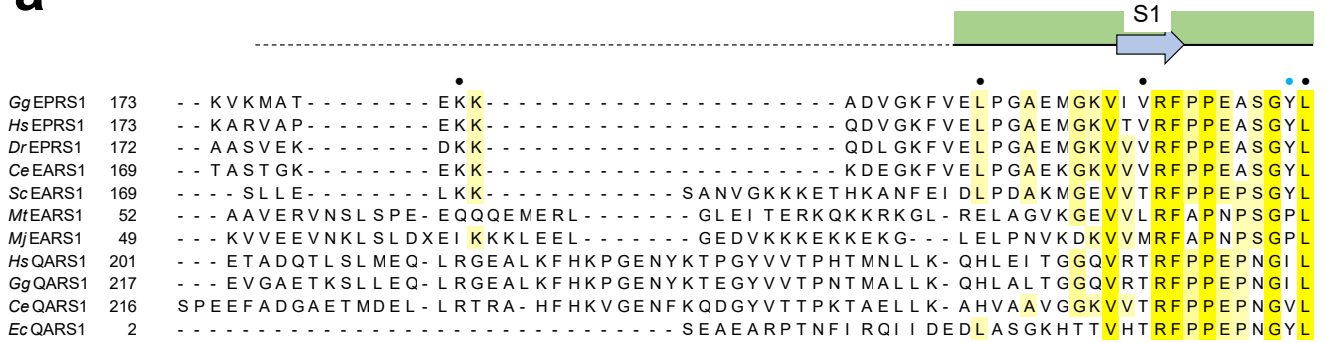

**Dinucleotide-binding**

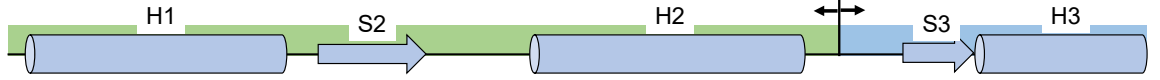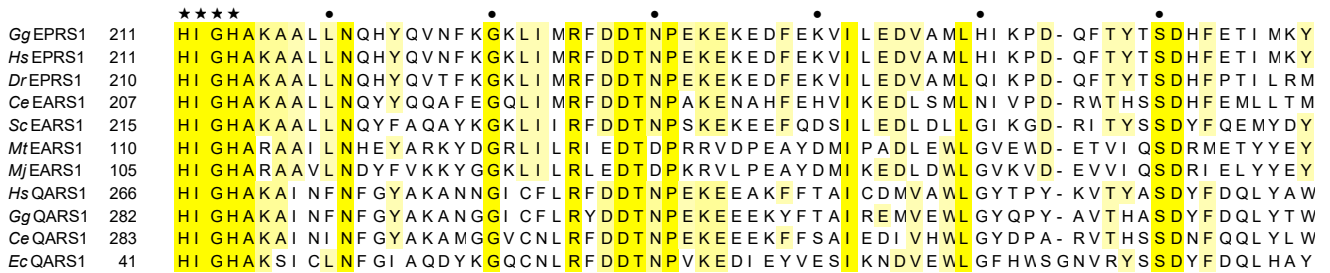

**Acceptor end-binding**

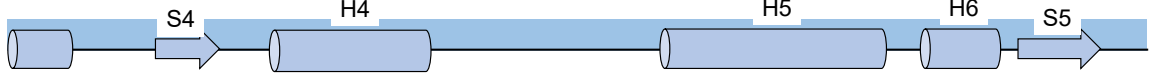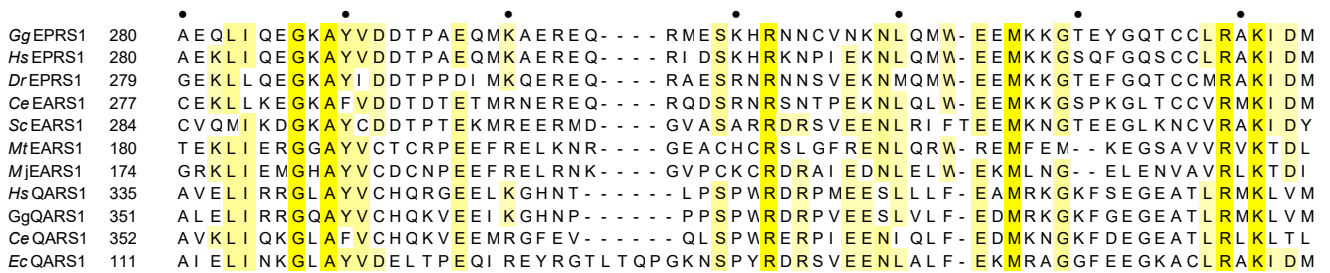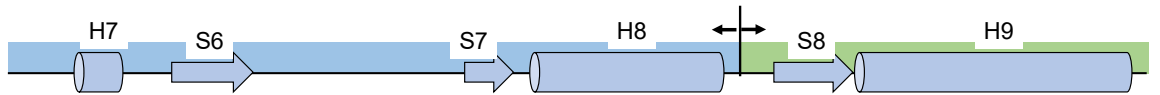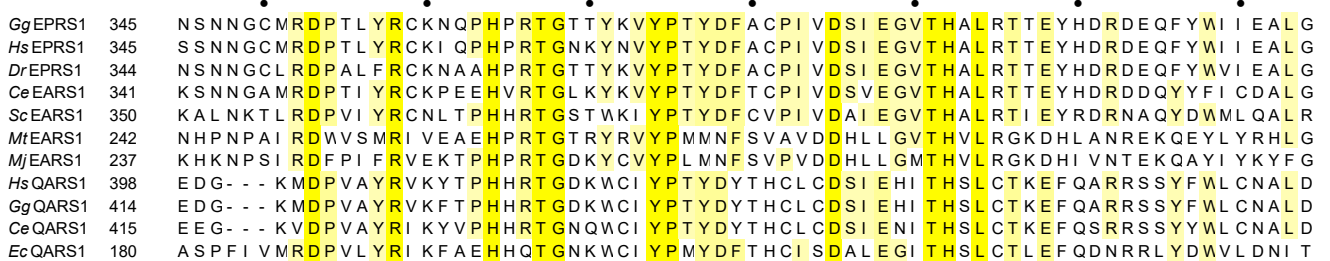

**Dinucleotide-binding Helical**

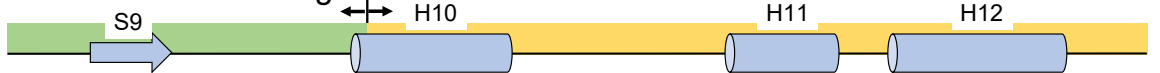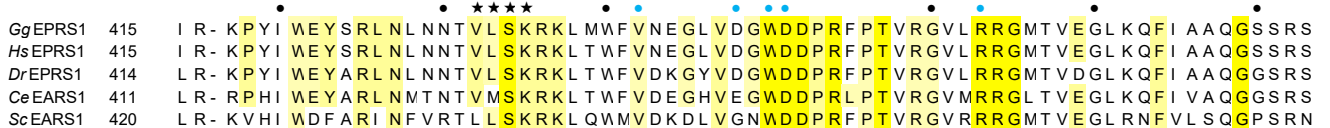



|                |     |                                                                                |
|----------------|-----|--------------------------------------------------------------------------------|
| <i>MtEARS1</i> | 312 | WE - PPEFIHYGR LKMDDVALSTSGAREGI LRGEYSGWDDPRLGTLRAIARRGI RPEAIRKLMVEI GVKI A  |
| <i>MjEARS1</i> | 307 | WE - MPEFIHYGLIKIEDI VLSTSSMYKGI KEGLYSGWDDVRLGTLRALRRRGI KPEAIYEI MKRI GI KQA |
| <i>HsQARS1</i> | 463 | VY - CPVQWEYGR LNLHYAVVSKRRI LQLVATGAVRDWDDPRLFTLTALRRGFPEAI NNFCARV GVTVA     |
| <i>GgQARS1</i> | 481 | VY - CPVQWEYGR LNLLYTVVSKRRI I RL VETGAVRDWDDPRLFTLTALRRGFPEAI NNFCARV GVTVA   |
| <i>CeQARS1</i> | 482 | I Y - CPVQWEYGR LNVNYTVVSKRRI LKLI TTKTVNDWDDPRLFTLTALRRGGI PSEAINRFVAKL GLTMS |
| <i>EcQARS1</i> | 250 | I PVVHPRQYEF SRLNLEYTVMSKRKLNLLVTDKHVEGWDDPRMPTI SGLRRRGYTAASI REFCKRI GVTKQ   |

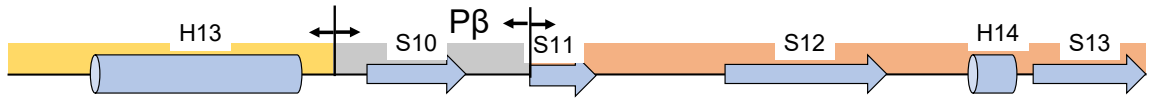

|                |     |                                                                                       |
|----------------|-----|---------------------------------------------------------------------------------------|
| <i>GgEPRS1</i> | 484 | VVNMEWDKI WSNFKKVI DPVAPRYTALLKDAVVPVNVPEAQ - - EEMKE - - - VAKHPKNADVGL - KPVWY      |
| <i>HsEPRS1</i> | 484 | VVNMEWDKI WAFNKKVI DPVAPRYVALLKKEVI PVNVPEAQ - - EEMKE - - - VAKHPKNPEVGL - KPVWY     |
| <i>DrEPRS1</i> | 483 | VVNMEWDKI WAFNKKVI DPVAPRFTALLSSQVI PVCVSEAK - - ETMKE - - - VPKHPKNADVGL - KQVWY     |
| <i>CeEARS1</i> | 480 | VVMMEWDKI WAFNKKVI DPVAPRYTALDSTS - - PLVSI ELT - - DSI SDDTSNVSLHPKNAEI GS - KDVHK   |
| <i>ScEARS1</i> | 489 | V I NLEWNL I WAFNKKVI DPI APRHTAI VNPVKI HLEGSEAPQEPKI EM - - - KPCHKKNPAVGE - KKVY Y |
| <i>MtEARS1</i> | 381 | DSTMWKKI YGLNRSI LEEEARRYFFAADPVKLEVVGLPG - - - PVRVE - - - RPLHPDHPEI GN - RVLEL     |
| <i>MjEARS1</i> | 376 | DVKFSWENLYAI NKELI DKDARRFFFVNPVKLI I EGAE - - - KKV LK - - - LRMHPDRPEFGE - RELI F   |
| <i>HsQARS1</i> | 534 | QTTMEPHLLEACVRDVLNDTAPRAMAVLESLRVI I TNFPAAK - SLDI Q - - - VPNFPADETKGF - HQVPP      |
| <i>GgQARS1</i> | 550 | QATMEPHLLEACVRDVLNEQAPRAMAVLEPLKVTI TNFPAPQ - AI DVL - - - VPNFPADESRGF - HKVPP       |
| <i>CeQARS1</i> | 551 | QMVI DPHVLDATVRDYLNI HAPRTMAVLEGLKVTI ENFSELNLPSSVD - - - VPDFSPDPTDRKHSVSV           |
| <i>EcQARS1</i> | 320 | DNTI EMASLESCI REDLNENAPRAMAVI DPVKLVI ENYQGE - - GEMVT - - - MPNHPNKPEMGS - RQVPP    |

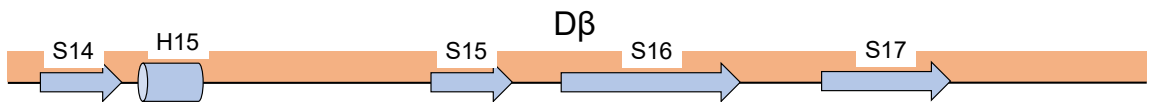

|                |     |                                                                                          |
|----------------|-----|------------------------------------------------------------------------------------------|
| <i>GgEPRS1</i> | 547 | GSKVLI EGADAE - - - - - TLTEGEVVTFI NWG - NI I I TKLNRSNMSGKI VSI DTKLNLND - - - - - NKD |
| <i>HsEPRS1</i> | 547 | SPKVFI EGADAE - - - - - TFSEGEMVTFI NWG - NLNI TKI HKNADGKI I SLDAKLNLE - - - - - NKD    |
| <i>DrEPRS1</i> | 546 | GPKVFI EGADAE - - - - - TFTEGEI VTFI NWG - NI I I TKI HRDSSGAI LSLDGHLNLE - - - - - NTD  |
| <i>CeEARS1</i> | 545 | GKKLLLEQVDAA - - - - - ALKEGEI VTFVNWG - NI KI GKI EKKGA - VI TKI SATLQLD - - - - - NTD  |
| <i>ScEARS1</i> | 554 | YKDI VVDKDDAD - - - - - VI NVDEEVTLMDWG - NVI I TKNDDG - - - - - SMVAKLNLE - - - - - GDF |
| <i>MtEARS1</i> | 443 | RGEVYLP GDDLG - - - - - EGPLRLI DAV - NVI YSGGELR - - - - - YHSEGI E - - - - - EAR       |
| <i>MjEARS1</i> | 437 | DGEVYVVGDELE - - - - - ENKMYRLMELF - NI VVEKVDDI ALA - - - - - KYHSDDFK - - - - - IAR    |
| <i>HsQARS1</i> | 598 | API VFI ERTDFK - EEPEPGFKRLAVGQPVGLRHTGYVI ELQHVVKGPSGCVESLEVT CRR - - - - - DAG         |
| <i>GgQARS1</i> | 614 | QSVVYI VESDFK - EEADRGYKRLALGQPVGLRHTGYVI AVQNV I KDARGRVI ELEVTCTKS - - - - - DAA       |
| <i>CeQARS1</i> | 617 | DREI FI EKSDYKPDSDSKSFRRLTPKQAVGLKHI GLVLRVVKVEVKDAEGHVT EVVVKA EKL - - - - - SEK        |
| <i>EcQARS1</i> | 383 | SGEI WI DRADF - EEANKQYKRLVLGKEVRLRNAY - VI KAERVEKDAEGNI TTI FCTYDADT LSKDPADG          |

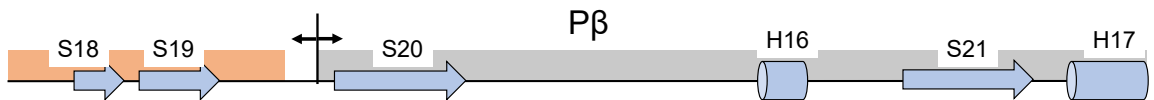

|                |     |                                                                                          |
|----------------|-----|------------------------------------------------------------------------------------------|
| <i>GgEPRS1</i> | 601 | FKKTTKITWLAETPRAP - - LIPTVCVNYEHLITKPVLGK - - - DEDFKQYI NRNSKQEE - LMLGDPCLKD          |
| <i>HsEPRS1</i> | 601 | YKKTTKVITWLAETTHAL - - PI PVI CVTYEHLITKPVLGK - - - DEDFKQYV NKNSKHEE - LMLGDPCLKD       |
| <i>DrEPRS1</i> | 600 | YKKTTKITWLAESSRAS - - FVPTVCVNYQH LI T KPVLGK - - - DDDFKDYI NKNSKI EE - KMI GDPCLKD     |
| <i>CeEARS1</i> | 598 | YKKTTKVITWLDGVKAEAGKTI PVVTADYDHI I SKAI I GK - - - DEDWKQFI NFDSVHYT - KMGEPAI KN       |
| <i>ScEARS1</i> | 603 | KKT KHLT W LADTKD - - - VVPVDLVDFDHLI TKDRLEE - - - DESFEDFLTPQTEFHT - DAI ADLNVKD       |
| <i>MtEARS1</i> | 485 | ELGASMIHWVPAES - - - ALEAEVI MPDASRV - - - - - - - - - - - RGVI EADASE                   |
| <i>MjEARS1</i> | 484 | KNKAKI IHWI PVKD - - - - - SVKVKVLMPDGEI K - - - - - - - - - - - EGFAEKDFAK              |
| <i>HsQARS1</i> | 661 | EKPKAFIHWVVSQ - - - - - PLMCEVRLYERLFQHKNPEDPTEVPGGF LSDLNLASLHVVDAAALVDCSVAL            |
| <i>GgQARS1</i> | 677 | EKPKAFIHWVSE - - - - - PRVCEVRLYERLFLHKNPEDPSEVPGGFLSDDLNPDSL RVVDDALV DSSVLG            |
| <i>CeQARS1</i> | 681 | DKPKAFIHWVAK - - - - - PVSCEVRLYDRLFKSKNPEDAQLVPGGF LSDI NPDSLTVVYNALI DQSI AK           |
| <i>EcQARS1</i> | 451 | RKVKGV IHWVSAAH - - - - - ALPVEI RLYDRLFVSNPGA - - - - - ADDFLSVI NPESLVI K - QGFAEPSLKD |

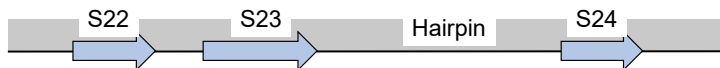

|                |     |                                                         |
|----------------|-----|---------------------------------------------------------|
| <i>GgEPRS1</i> | 664 | LKKGDI IQLQRGFFI CDQPYE - PVSPYSCKEAPCI LIYI PDGH       |
| <i>HsEPRS1</i> | 664 | LKKGDI IQLQRGFFI CDQPYE - PVSPYSCKEAPCVLIYI PDGH        |
| <i>DrEPRS1</i> | 663 | LKKGDI IQLQRGFYI CDQPYE - PISPHSCRESPCVLLIYI PDGH       |
| <i>CeEARS1</i> | 663 | VKKGDI I QIQKGFYI VDQPYN - PKSELSGVETPLLLI AI PDGH      |
| <i>ScEARS1</i> | 664 | MKI GDI I QFERKGYRRLDALPK - DGKPY - - - - - VFFT I PDGH |
| <i>MtEARS1</i> | 523 | LEVDDVVQLERFGFARLDSAG - - PGMV - - - - - FYAHK - - -    |
| <i>MjEARS1</i> | 522 | VEVDDI I QFERFGFVRI DKKDN - DGFVC - - - - - CYAHR - - - |
| <i>HsQARS1</i> | 724 | AKPFDKFQFERLGYFSVDPDSH - QGKLV - - - - - FNRTVTLKE      |
| <i>GgQARS1</i> | 740 | ARPFDFKQFERLGYFSVDPDST - DSKLV - - - - - FNRTVTLKE      |
| <i>CeQARS1</i> | 744 | SKVYDRFQFERI GFFCVDRDST - SSTLV - - - - - FNRTVMLKD     |
| <i>EcQARS1</i> | 511 | AVAGKAFQFEREGYFCLDSRHSTAEPV - - - - - FNRTVGLRD         |

**b**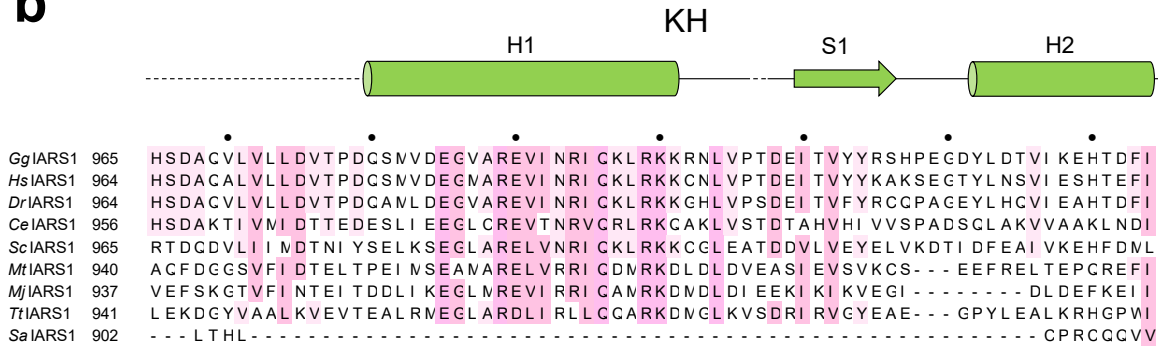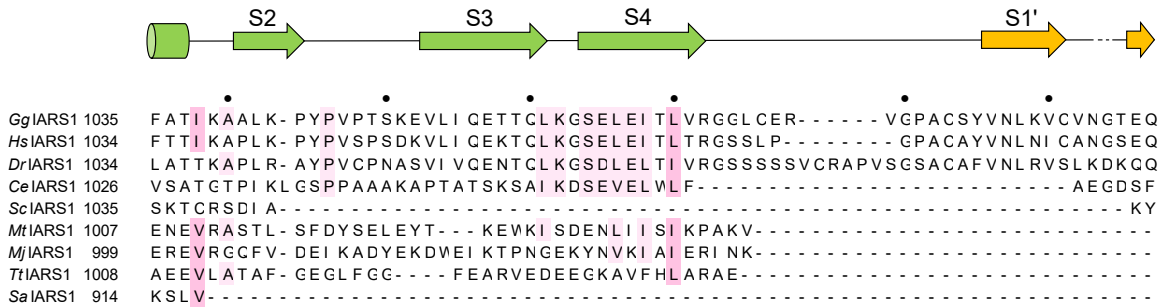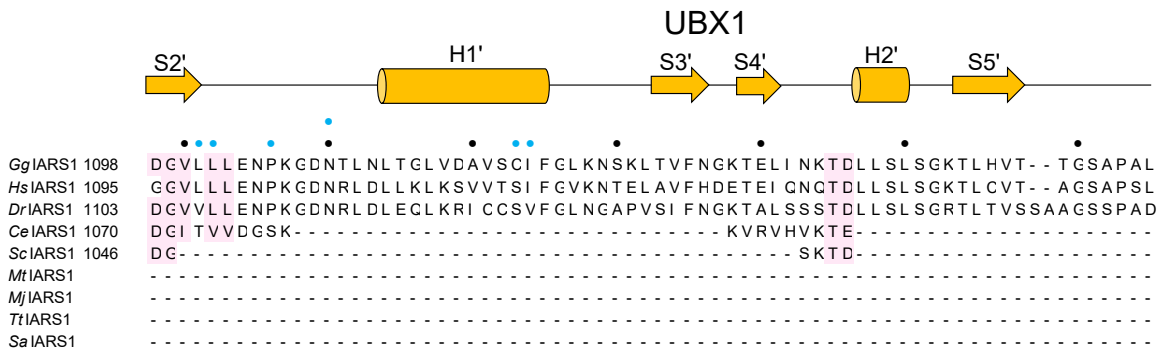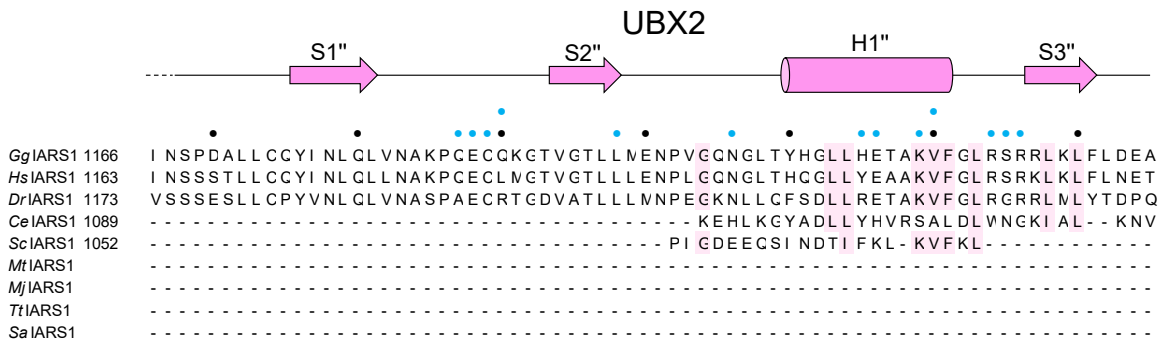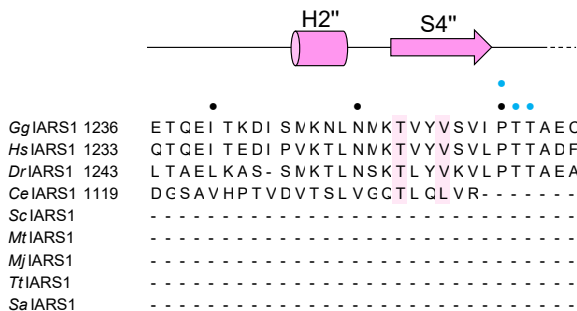

### **Supplementary Figure 5 Sequence alignments of EARS1 and QARS1 or IARS1. a**

Structure-based sequence alignments of EARS1 and QARS1 orthologs. The organisms of EARS1 are *Gallus gallus* (Accession, XP\_015139136), *Homo sapiens* (NP\_004437), *Danio rerio* (NP\_001275581), *Caenorhabditis elegans* (NP\_001366832), *Saccharomyces cerevisiae* (NP\_011269), *Methanothermobacter thermautotrophicus* (WP\_010875691) and *Methanocaldococcus jannaschii* (WP\_010870894). The organisms of QARS1 are *H. sapiens* (Accession, NP\_001259002), *G. gallus* (NP\_001012800), *Caenorhabditis elegans* (NP\_001255843) and *Escherichia. coli* (NP\_308737). The secondary structure of GgEARS1 is displayed above the sequences. The locations and functions of the key residues are highlighted and annotated. H,  $\alpha$ -helix; S,  $\beta$ -sheet; black star, signature motif; blue circle, IARS1 interaction residues. Every tenth residue is marked with a black dot. **b** Structure-based sequence alignments of IARS1 orthologs. The organisms of IARS1 are *G. gallus* (Uniprot ID, A0A3Q2UG33), *H. sapiens* (P41252), *D. rerio* (F1QSY7), *C. elegans* (Q21926), *S. cerevisiae* (P09436), *M. thermautotrophicus* (O27428), *M. jannaschii* (Q58357), *Thermus thermophilus* (P56690), and *Staphylococcus aureus* (P41972). The secondary structure of GgIARS1 is displayed above the sequences. The locations and functions of the key residues are highlighted and annotated.

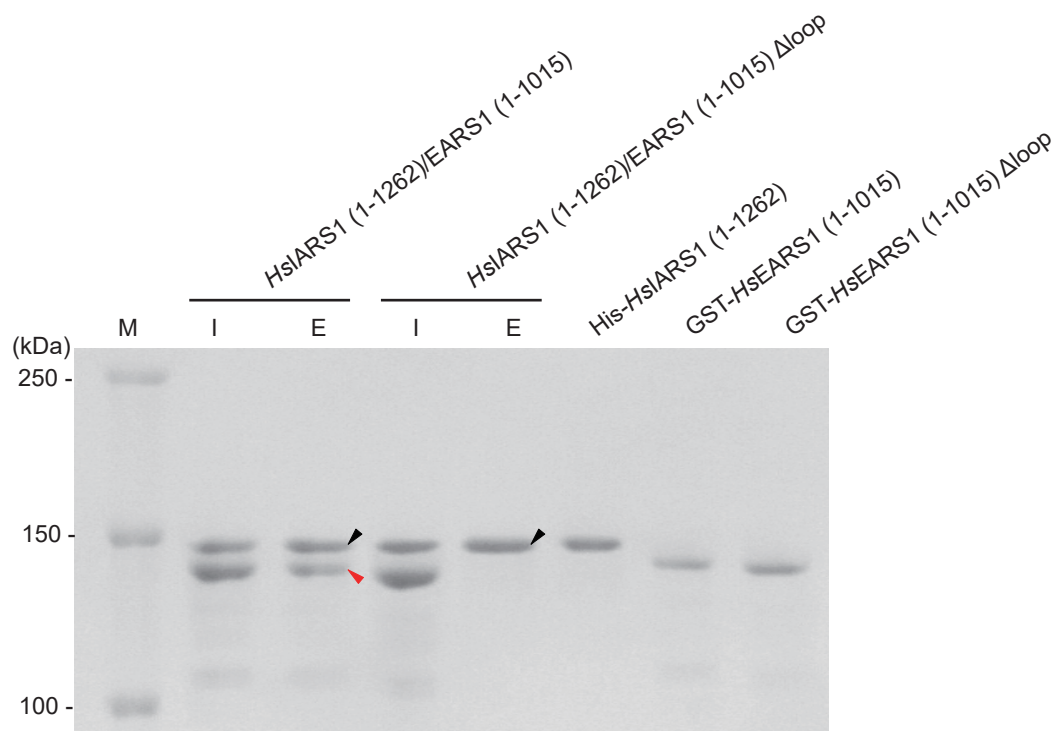

**Supplementary Figure 6 The hairpin loop of EARS1 is the primary binding site for IARS1.** Affinity pull-down analysis of the interaction between IARS1 and the hairpin-deleted EARS1 with three WHEP repeats. The input (I) and eluate (E) fractions were analyzed by SDS-PAGE and Coomassie Blue staining. Black and red arrowheads indicate eluted His-IARS1 and GST-EARS1, respectively. The data are representative of three independent experiments. Source data are provided as a Source Data file.

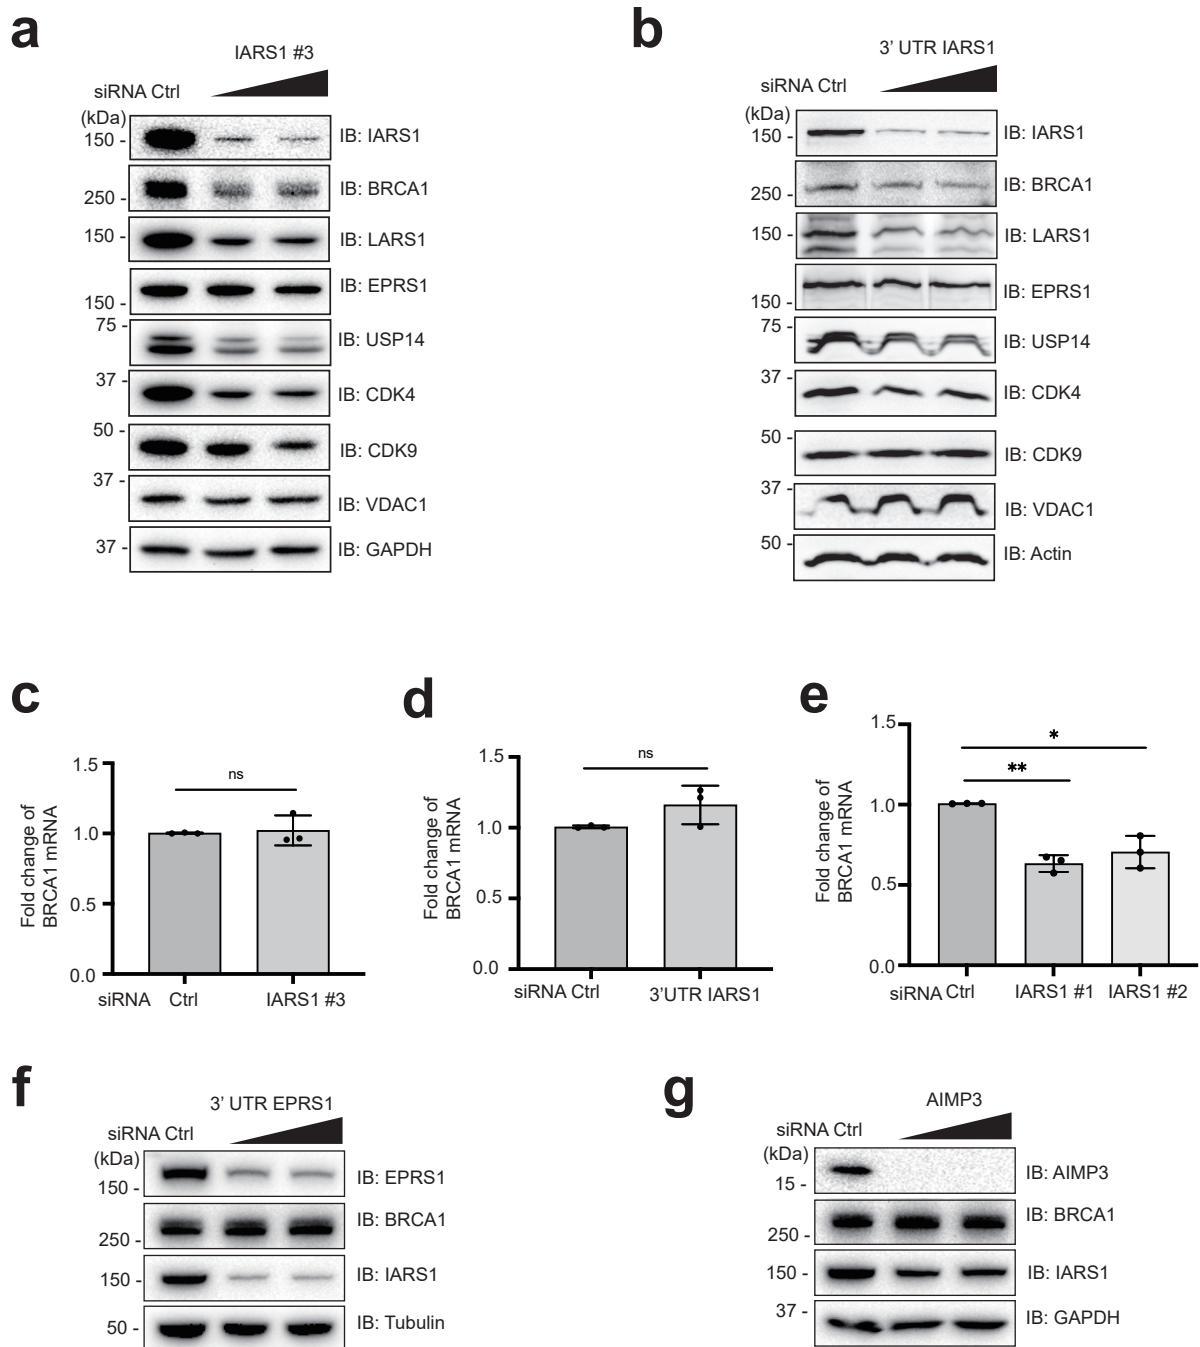

**Supplementary Figure 7 Effects of IARS1 depletion on the stabilities of putative binding proteins.** **a, b** Protein extracts from HeLa cells transfected with control siRNA or siRNA<sup>IARS1</sup>#3 (**a**) and 3'UTR-specific siRNA<sup>IARS1</sup> (**b**) were immunoblotted with anti-IARS1, anti-BRCA1, anti-LARS1, anti-EPRS, anti-USP14, anti-CDK4, anti-CDK9, anti-VDAC1, and anti-GAPDH or actin (loading control) antibodies. Transfections were performed with two siRNAs<sup>IARS1</sup> at 40nM or 80nM. The data are representative of three independent experiments.

**Supplementary Figure 8 Nuclear localization of IARS1.** **a** The subcellular localization of overexpressed Flag-tagged IARS1 in HeLa cells was examined by immunofluorescence microscopy. Nuclei were stained with DAPI (blue). Scale bars represent 10  $\mu\text{m}$ . **b** HeLa cells were transfected with Flag-tagged IARS1 for cytosolic and nuclear fractionation analysis. Lamin A/C and GAPDH were used as nuclear and cytoplasmic markers, respectively. WCL, whole-cell lysates. The data are representative of three independent experiments. Source data are provided as a Source Data file.

**a**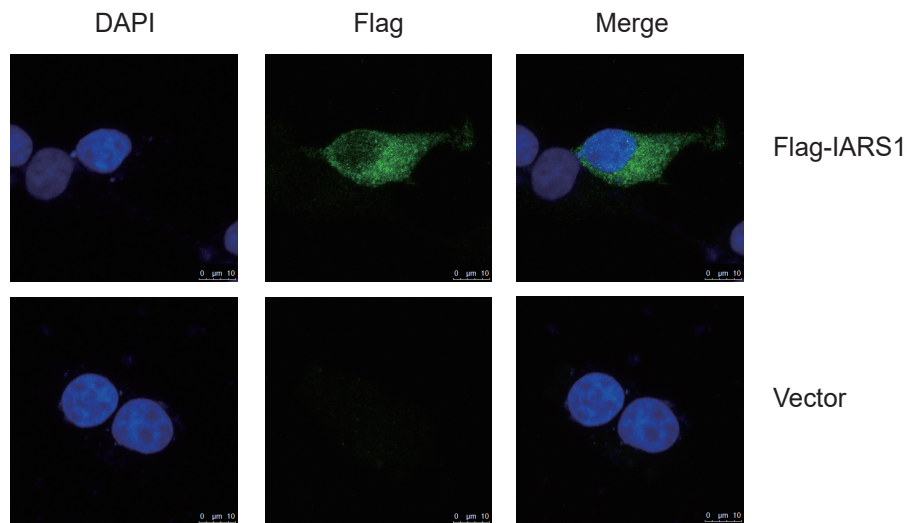**b**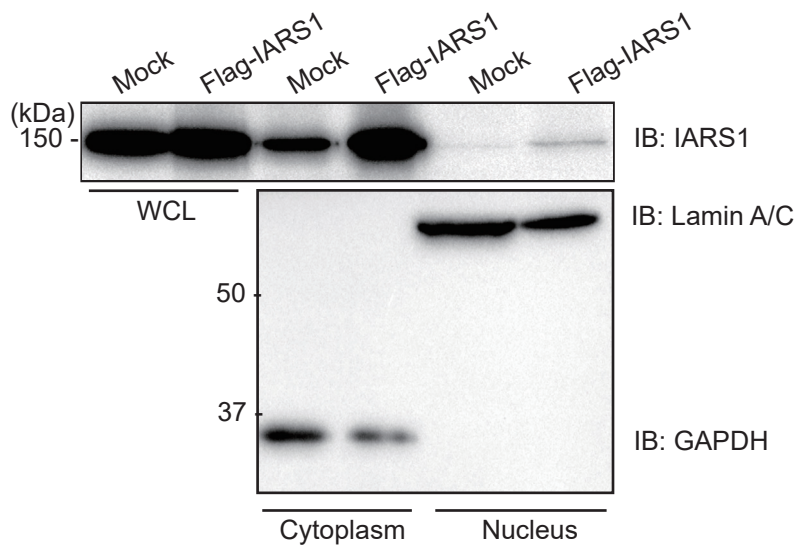

**Supplementary Figure 8 Nuclear localization of IARS1.** **a** The subcellular localization of overexpressed Flag-tagged IARS1 in HeLa cells was examined by immunofluorescence microscopy. Nuclei were stained with DAPI (blue). Scale bars represent 10 μm. **b** HeLa cells were transfected with Flag-tagged IARS1 for cytosolic and nuclear fractionation analysis. Lamin A/C and GAPDH were used as nuclear and cytoplasmic markers, respectively. WCL, whole-cell lysates. The data are representative of three independent experiments. Source data are provided as a Source Data file.

**a**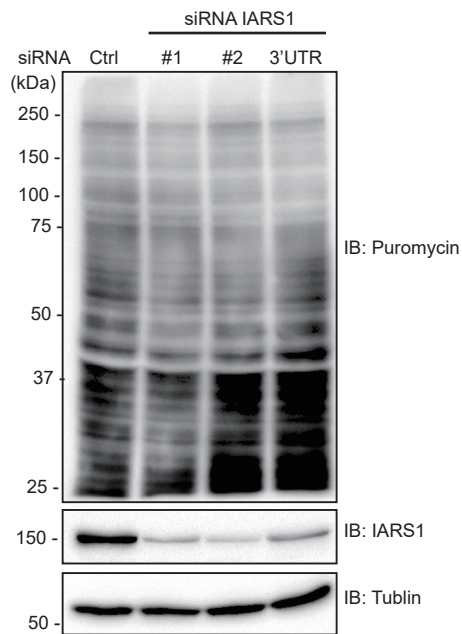**b**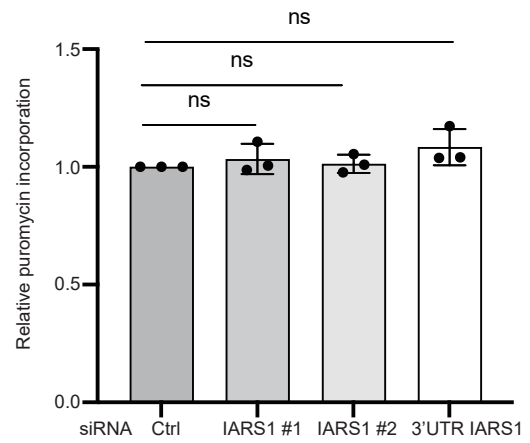

**Supplementary Figure 9 Effects of IARS1 depletion on *de novo* protein synthesis. a**

HeLa cells were transfected with control siRNA or three siRNA<sup>IARS1</sup> and treated with 1  $\mu$ M puromycin for 30 min to label nascent peptides. Nascent peptides labeled with puromycin were detected by immunoblotting with an anti-puromycin antibody. Tubulin served as a loading control. **b** Quantification of puromycin labeled proteins in (a). Graph shows relative amounts of puromycin incorporation. Error bars represent the mean values  $\pm$  SD (n=3). ns, not significant by the analysis of two-tailed paired Student's t-test. Source data are provided as a Source Data file.



**a**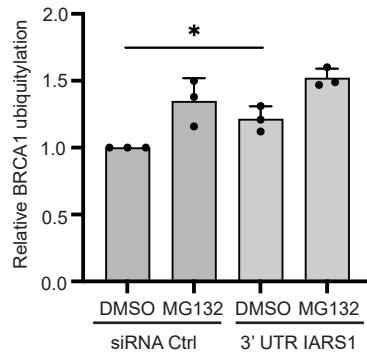**b**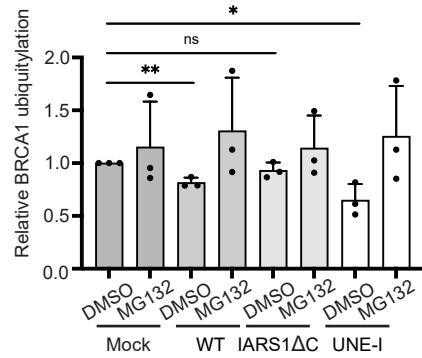**c**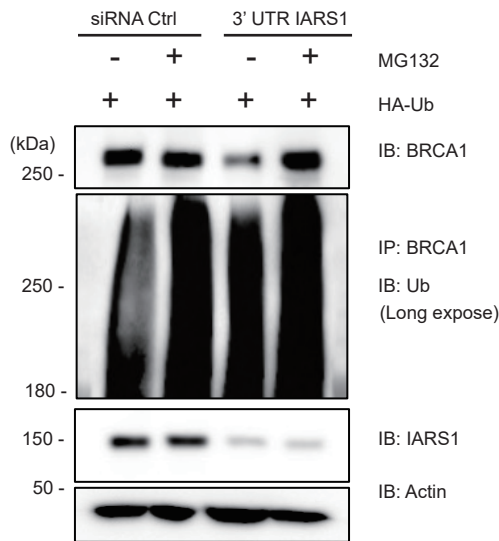**d**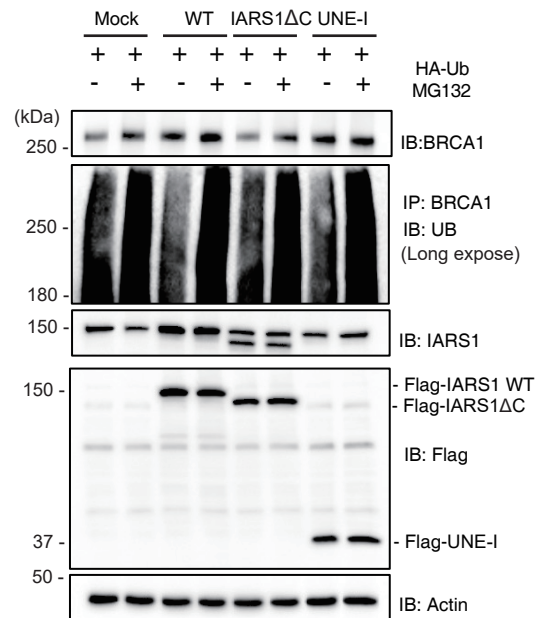**e**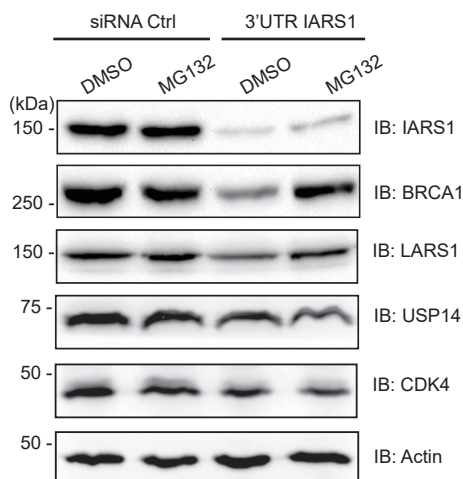**f**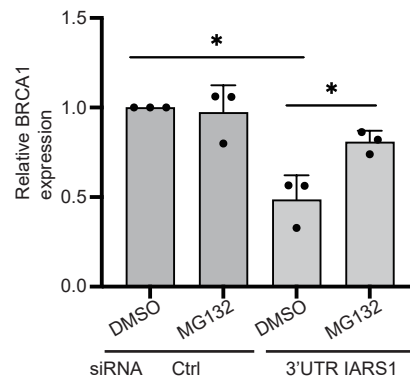

**Supplementary Figure 10 The UBX domains of IARS1 are responsible for BRCA1 stability.** **a** Quantification of ubiquitylated BRCA1 (Fig. 4d) in HEK293T cells transfected with control siRNA or 3'UTR-specific siRNA<sup>IARS1</sup>. The mean values  $\pm$  SD of three independent (siRNA Ctrl and 3'UTR-specific siRNA<sup>IARS1</sup>) experiments are shown.

**b** Quantification of ubiquitylated BRCA1 (Fig. 4e) in HEK293T cells transfected with full-length IARS1, IARS1 $\Delta$ C, and IARS1 UNE-I alone. The mean values  $\pm$  SD of three independent (WT, IARS1 $\Delta$ C, and IARS1 UNE-I) experiments are shown. \* $P$  < 0.05, \*\* $P$  < 0.01, ns, not significant by the analysis of two-tailed paired Student's t-test in **a** and **b**.

**c** *In vivo* ubiquitylation assay of BRCA1 in HEK293T cells transfected with control siRNA or 3'UTR-specific siRNA<sup>IARS1</sup>. **d** *In vivo* ubiquitylation assay of BRCA1 in HEK293T cells transfected with full-length IARS1, IARS1 $\Delta$ C, and IARS1 UNE-I alone. **e** HeLa cells transfected with control siRNA or 3'UTR-specific siRNA<sup>IARS1</sup> were treated with 10  $\mu$ M MG132 for 4 hr and analyzed by immunoblotting with the indicated antibodies. **f** Quantification of BRCA1 proteins in **e**. The mean values  $\pm$  SD of three independent (siRNA Ctrl and 3'UTR-specific siRNA<sup>IARS1</sup>) experiments are shown. \* $P$  < 0.05, \*\* $P$  < 0.01 by the analysis of two-tailed paired Student's t-test. Source data are provided as a Source Data file.

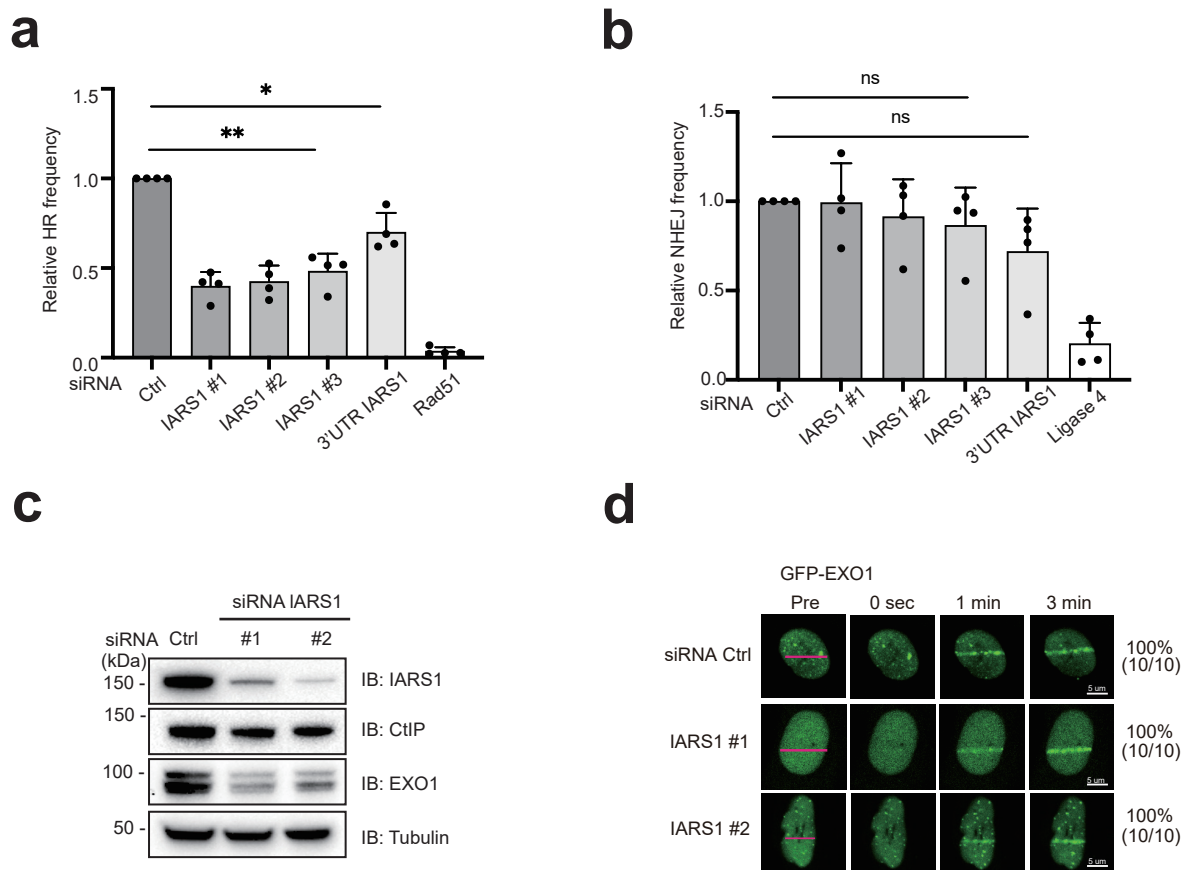

**Supplementary Figure 11 Effects of IARS1 depletion on the stabilities of DNA damage response proteins.** **a** I-SceI-DSB-induced HR efficiencies were determined in DR-U2OS cells upon treatment with control siRNA, three siRNA<sup>IARS1</sup>, or siRNA<sup>Rad51</sup>. **b** Efficiency of NHEJ in EJ5-U2OS cells was measured after transfection of control, three siRNA<sup>IARS1</sup>, or siRNA<sup>Ligase4</sup>. **a, b** Data are represented as mean values  $\pm$  SD (n=4, independent cell culture). \* $P < 0.05$ , \*\* $P < 0.01$ , ns, not significant by the analysis of two-tailed paired Student's t-test. **c** Protein extracts from HeLa cells transfected with control siRNA or two siRNAs<sup>IARS1</sup> were immunoblotted using anti-IARS1, anti-CtIP, anti-EXO1, and anti-tubulin (loading control) antibodies. **d** U2OS cells overexpressing GFP-EXO1 were transfected with control siRNA or two siRNAs<sup>IARS1</sup> and exposed to laser microirradiation. Laser stripes were examined at the indicated time point. EXO1 recruitment to DSB site was calculated from GFP positive cells over total counted cells. **c, d** The data are representative of three independent experiments. Source data are provided as a Source Data file.

## Supplementary Note

### Overall structure of EARS1

*GgEARS1* forms an elongated shape with the N-terminal region formed by the acceptor end- and dinucleotide-binding domains and the C-terminal anticodon-binding domain formed by the P $\beta$  and D $\beta$  domains. The dinucleotide-binding and P $\beta$  domains are connected by the helical subdomain (residues 433–503), which is formed by four helices in the middle and contacts the D-arm of tRNA. While the electron density map of the N-terminal catalytic domain is clear, both  $\beta$ -barrel subdomains in the C-terminal anticodon-binding domain show significant disorder in the apo *GgEARS1* structure, indicating that the regions are highly mobile. The most noticeable disordered regions include a hairpin loop (residues 687–692; loop S23-S24) in the P $\beta$  domain, and residues 583–586 and 600–605 in the D $\beta$  domain. Additional disordered regions include residues 545–546 and 560–563. However, most of the disordered regions become ordered upon complex formation with IARS1.

### Structural comparison with archaeal EARS1 and bacterial and mammalian QARS1s

The overall structure of *GgEARS1* is highly similar to those of QARS1 and archaeal EARS1, and can be superimposed on those of human QARS1 (PDB 4R3Z)<sup>2</sup>, *E. coli* QARS1 (PDB 1QTQ)<sup>3</sup>, and archaeal EARS1 (PDB 3AII)<sup>1</sup> with the rms deviation values of 1.8–2.5 Å (386–430 C $\alpha$  atoms). In the superimposed structures, eukaryotic EARS1 more resembles bacterial and eukaryotic QARS1s than archaeal EARS1 (Supplementary Fig. 3). In all five domains of QARS1 and EARS1, the D $\beta$  domain exhibits the largest deviations, and the selectivity for anticodon binding (Glu or Gln) could be determined by these differences (Supplementary Fig. 3). Three regions of *GgEARS1*, namely, the IARS1-binding site and anticodon- and acceptor end-binding sites, exhibit most notable differences with respect to QARS1s and archaeal EARS1.

### Four loops provide specificity for the binding of tRNA<sup>Glu</sup> to vertebrate EARS1

The most significant difference between *GgEARS1* and archaeal EARS1 or QARS1 is observed in the opposite face of the tRNA-binding interface (Fig. 1 and Supplementary Fig. 3). The  $\beta$ -hairpin loop (residues 684–695) in the P $\beta$  domain is present only in vertebrate EARS1, not in archaeal EARS1 or bacterial or mammalian QARS1. In the apo *GgEARS1* structure, this loop is disordered, but in the IARS1-bound state, several main chains of the hairpin loop pair with each other to form a well-ordered  $\beta$ -hairpin structure.

Notable differences are also observed at the U33 and C34 site: the S17-S18 loop in the D $\beta$  domain is present only in *GgEARS1* (light blue), not in archaeal *EARS1* or bacterial *QARS1*. The *HsQARS1* is more similar to *GgEARS1* in this region. Nevertheless, the corresponding loop of human *QARS1* is 6 to 10 Å away from the S17-S18 loop of *GgEARS1*. This loop (Phe601 and Lys602) is proximal to the phosphodiester oxygens of U33 and C34 in the modeled tRNA in the anticodon-binding site (Supplementary Fig. 3e). In *EcQARS1* (yellow), no interaction is observed between the amino acid residues and phosphodiester oxygens of U33 and C34. This large difference in the anticodon-binding domain may contribute to the selectivity for binding of tRNA<sup>Glu</sup> over tRNA<sup>Gln</sup> by vertebrate *EARS1*.

There is another notable difference in the tRNA-binding surface, both in the anticodon- and acceptor end-binding sites, which confer the selectivity for tRNA<sup>Glu/Gln</sup>. The anticodon for Glu is CUC, whereas the anticodon for Gln is CUG<sup>1</sup>. In *EcQARS1*, G36 and A37 in the anticodon loop are sandwiched between the P $\beta$  and D $\beta$  domains (Supplementary Fig. 3f). In the aligned structures with tRNA-bound *EcQARS1*, the base of G36 is packed by a 10 residue loop containing Gln399, Lys401, and Arg402 of *EcQARS1*. The loop is also conserved in *HsQARS1*. Arg402 (or Arg629 in *HsQARS1*) forms an H-bond with G36. In both *EcQARS1* and *HsQARS1*, the phosphodiester oxygens of A37 and U38 are stabilized by Arg545 in the C-terminal loop on the opposite side. Archaeal *EARS1* forms a shorter loop in this region, but nevertheless has a weak interaction. Thus, these three proteins could efficiently recognize the purine base at this position. By contrast, *GgEARS1* does not have an equivalent loop and no interaction can be formed to stabilize the G36 base (Supplementary Fig. 3f).

In the acceptor arm-binding site, *EcQARS1* contains a four residue  $\beta$ -turn (residues 133 to 136), from which Leu136 wedges the G2-C71 base pairs. This  $\beta$ -turn wedge is not present in *GgEARS1*. Hence, T1-A72 and G2-C71 (the equivalent acceptor arm base pairs) stack against Glu304 and Gln305 of *GgEARS1* (Supplementary Fig. 3g). The corresponding region in *HsQARS1* shows clear differences. Loop H4-H5 in *GgEARS1* is missing in *HsQARS1* (magenta). In addition, loop S5-H7 exhibits significant conformational differences and Met344 differs from Met408 in *HsEARS1* by 7.8 Å. Archaeal *EARS1* also lacks this  $\beta$ -turn. Most of other regions in the acceptor loop are conserved. Collectively, the anticodon-

and acceptor arm-binding sites are clearly distinct in eukaryotic EARS1 and QARS1, demonstrating the specificity of each aaRS.

## Supplementary Methods

### Crystallization of EARS1 and data collection

The native *GgEARS1* crystals were grown at 20°C using the hanging drop vapor diffusion method. The *GgEARS1* crystallization buffer contained 85 mM HEPES (pH 7.5), 8.5% isopropanol, 15% glycerol, 40 mM NaF, and 15% PEG 8000. The *GgEARS1* mercury (Hg) derivative crystals were obtained by soaking native crystals in 0.5 mM Thimerosal solution for 7 hr and then back-soaking them in crystallization buffer. The resulting crystals belonged to the  $P2_1$  space group ( $a = 89.0$  Å,  $b = 41.8$  Å,  $c = 92.2$  Å,  $\beta = 100.0^\circ$ ). Diffraction data were collected at  $-170^\circ\text{C}$  using crystals flash-frozen in crystallization buffer containing 25% glycerol. Diffraction data were collected at 1.0094 Å on Beamline 11C of the Pohang Advanced Light Source (PAL). Datasets of *GgEARS1* Hg derivative crystals were processed using the HKL2000 package<sup>5</sup>.

### Determination of the EARS1 structure

The *GgEARS1* structure was determined by a combination of the molecular replacement and single-wavelength anomalous dispersion methods using crystals containing Hg-derivatized *GgEARS1*. Initially, molecules of the N-terminal UNE-Q domain-deleted catalytic domain of human QARS1 (PDB 4R3Z)<sup>2</sup> were located with the PHASER<sup>6</sup> program, followed by a search for the anticodon-binding domain of human QARS1. Four Hg sites in the asymmetric unit were identified at 3.0 Å resolution using the PHENIX AutoSol<sup>7</sup> program. After flattening the solvent, a high-quality electron density map with a resolution of 2.5 Å was obtained using the PHENIX<sup>7</sup> program. Successive rounds of model building with COOT<sup>8</sup> and refinement with PHENIX<sup>7</sup> were employed to build the complete model. The final refined *GgEARS1* model at 2.5 Å resolution ( $R_{\text{work}}/R_{\text{free}}$  of 23.2%/27.4%) had 92.6% of its residues in the most favored region and 2% of residues in the disallowed region (Table 1). The model did not include residues 526, 545, 546, 550, 560–563, 566, 572, 583–586, 600–605, and 687–692 of the anticodon-binding domain.

### Data collection using XFELs

The fixed-target serial femtosecond crystallography (FT-SFX) experiment using a nylon mesh and X-ray pulses was conducted at the Nano Crystallography and Coherence Imaging experimental hutch of the Pohang Advanced Light Source X-ray free electron laser<sup>9, 10</sup> (PAL-XFEL). The X-ray energy was 9.7 keV (1.2782 Å) and the photon flux was  $\sim 5 \times 10^{11}$

photons per pulse (<20 fs duration). The X-ray pulse was focused to 5 (horizontal) × 8 (vertical)  $\mu\text{m}^2$  (FWHM) using a Kirkpatrick–Baez mirror<sup>11</sup>. The data were collected from a sample chamber filled with helium gas at ambient pressure and room temperature (RT) and were recorded using a MX225-HS detector (Rayonix) with a 4 × 4 binning mode (pixel size: 156 × 156  $\mu\text{m}^2$ ). The motion stage for FT-SFX was designed to allow raster scanning of beams up to 60 Hz provided by PAL-XFEL and was custom-built by SmartAct. Piezo SLLV42 and SLL12 (SmartAct) actuators were used for translation in the horizontal and vertical directions, respectively. During raster scanning, the acrylic support containing the nylon mesh sample holder was translated 18 mm in both the vertical and horizontal directions in the sample chamber using a piezo linear stage to avoid illumination of the Al frame by the XFEL pulses. This scanning stage was motioned by a remote control system, without synchronization for the arrival of X-ray pulses. The diffraction images were collected with the raster scanning method from the top to the bottom of the chip, at 50  $\mu\text{m}$  intervals left to right, and then moved 50  $\mu\text{m}$  toward the bottom. The next scan was performed from right to left at 50 m intervals and then moved 50  $\mu\text{m}$  toward the bottom. These raster scanning motions were performed repeatedly until a full dataset had been collected. The velocity of the sample holder mounted in the motion stage was 1.5 mm/s in both the horizontal and vertical directions.

### **SFX data processing**

The diffraction pattern was monitored using OnDA<sup>12</sup>, and the hit images, defined as those images containing a minimum of 15 peaks, were filtered using the Cheetah program<sup>13</sup>. The ‘peak-finder 8’ algorithm was used with key peak-finding parameters, and yielded an average hit-rate of 69.1% (301,437 hits) for *GgEARS1*–*IARS1* crystals. The diffraction images were indexed, integrated, merged, and post-refined using CrystFEL<sup>14</sup>. Indexing was performed using a combination of MOSFLM<sup>15</sup>, which uses prior unit cell information for indexing, and DirAx. The detector geometry was refined with several iterations of the detector geometry optimization using CrystFEL’s geoptimiser for increasing the indexing rate, and the peaks used for indexing were those outputted from Cheetah<sup>13</sup>. Preliminary indexing results, which were obtained in synchrotron, strongly suggested a primitive orthorhombic lattice, and a subsequent round of indexing was performed. The final indexing rate was 16.9% (50,804 indexed patterns) for *GgEARS1*–*IARS1*. The intensities were merged using scaling, partiality, and post-refinement with a partialator in CrystFEL<sup>14</sup>.



## **Cell culture**

HEK293T, HeLa, and HCT116 cells were cultured in Dulbecco's Modified Eagle's Medium (Lonza or Hyclone) containing 10% fetal bovine serum (Wellgene or Hyclone) and 100 U/mL penicillin-streptomycin (Gibco). All cell lines were cultured in a humidified incubator with 5% CO<sub>2</sub> at 37°C.

## **cDNAs**

Wild-type EPRS was cloned into the pFlag CMV-2 vector with an N-terminal Flag tag. Flag-tagged EPRS with Ser688-to-Glu (S688E), Ser691-to-Glu (S691E), and Ser688- and Ser691-to-Glu (S688E and S691E) mutations and the hairpin loop-deleted EPRS mutant were generated by extension PCR and inserted into the pFlag CMV-2 vector. Wild-type IARS1, C-terminal truncated IARS1 (residues 1–1081), and IARS1 UNE-I (residues 942–1262) were cloned into the pFlag CMV-2 or pFlag CMV-10 vector with an N-terminal Flag tag. The 3xMyc-BRCA1 cDNA construct was kindly provided by Dr. Junjie Chen.

## **siRNAs**

For RNA interference, the following siRNAs against the coding sequence or 3'UTR of IARS1 were synthesized by Bioneer: siRNA #1, 5'-CUGAAGAGUGUUGUCACUA-3' (sense) and 5'-UAGUGACAACACUCUUCAG-3' (anti-sense); siRNA #2, 5'-CUGUGUAUGUUUCUGUGUU-3' (sense) and 5'-AACACAGAAACAUACACAG-3' (anti-sense); siRNA #3, 5'-GGAAGCCAGAUUGUCAGCCCUCUAU-3' (sense) and 5'-AUAGAGGGCUGACAAUCUGGCUUCC-3' (anti-sense); and 3'UTR siRNA, 5'-CUGAAGAGUGUUGUCACUA-3' (sense) and 5'-UAGUGACAACACUCUUCAG-3' (anti-sense). The following siRNAs against the coding sequence or 3'UTR of AIMP3 or EPRS were synthesized by Bioneer: siRNA AIMP3, 5'-CCAAGUCUAACAGGAUUGACUACUATT-3' (sense) and 5'-UAGUAGUCAAUCCUGUUAGACUUGGTT-3' (anti-sense); and 3'UTR siRNA EPRS, 5'-GCCUAAGUUAACAGUGGAU-3' (sense) and 5'-AUCCACUGUUAACUUAGGC-3' (anti-sense). A non-targeting scrambled siRNA (AccuTarget Negative Control siRNA) was purchased from Bioneer.

## **Antibodies**

An anti-Flag antibody (F1804, 1:2000) was purchased from Sigma-Aldrich. Anti-PARP1 (sc-8007, 1:1,000), anti-GAPDH (sc-47724, 1:5,000), anti-Ub (sc-8017, 1:200), anti-BRCA1 (C20, sc-642, 1:250), anti-IARS1 (sc-271826, 1:1,000), and anti-Lamin A/C (sc-376248, 1:1,000) antibodies were purchased from Santa Cruz Biotechnology. An anti-actin antibody (691001, 1:10,000) was purchased from MP Biomedicals. Anti-USP14 (ab192618, 1:2,000), anti-EPRS (ab31531, 1:2,000), anti-tubulin (ab15568, 1:2,000), and anti-EXO1 (ab95012, 1:1,000) antibodies were purchased from Abcam. An anti-Myc antibody (05-724, 1:1,000) was purchased from Millipore. Anti-CDK9 (2316, 1:1,000) and anti-VDAC (4866, 1:1,000) antibodies were purchased from Cell Signaling. An anti-CDK4 antibody (A304-225A, 1:2,000) was purchased from Bethyl Laboratories.

## **Transfection of cell lines**

Cells were transiently transfected with endotoxin-free plasmid DNAs using PEI (Polysciences) or Lipofectamine 3000 (Invitrogen), and all siRNAs were transfected using Lipofectamine RNAiMAX (Invitrogen), following the manufacturer's instructions. Cells were harvested 48 or 72 hr after transfection for further analysis. To deplete only endogenous IARS1, siRNA targeting the 3'UTR of IARS1 was transfected 5 hr after transfection of a plasmid expressing wild-type or mutant IARS1 protein.

## **Immunoblot analysis**

Cells were washed twice with ice-cold phosphate-buffered saline (PBS) and lysed with RIPA lysis buffer (25 mM Tris pH 7.5, 150 mM NaCl, 1% NP-40, 0.5% sodium deoxycholate, 0.1% SDS, 1 mM PMSF, and an EDTA-free protease inhibitor cocktail). The soluble fraction of the cell lysate was isolated by centrifugation at 13,000 rpm for 20 min at 4°C. Cell lysates were denatured in Laemmli sample buffer and boiled for 5 min at 95°C. Samples were resolved on Tris-glycine SDS-PAGE gels prepared using 40% acrylamide:bis-acrylamide (37:5:1) solution (Bio-Rad). After transfer to activated polyvinyl difluoride or nitrocellulose membranes, the membranes were blocked with 5% skim milk prepared in Tris-buffered saline containing Tween 20 and probed with a target-specific primary antibody. Thereafter, the membranes were incubated with a horseradish peroxidase- or IRdye 800-conjugated secondary antibody. Signals were detected using SuperSignal West Pico Sensitivity Substrate (Thermo Scientific) or a LI-COR Odyssey infrared imaging system.

### **RNA extraction and cDNA synthesis**

siRNA-transfected cells were lysed with 500  $\mu$ L TRIzol, and total RNA was extracted according to the manufacturer's instructions (Invitrogen). In brief, 100  $\mu$ L chloroform was added to lysed Hela cells, samples were centrifuged at 17,000 g for 15 min at 4°C, 150  $\mu$ L aqueous phase was collected, and RNA was precipitated from the aqueous phase by mixing with an equal volume of isopropanol. After incubation for 10 min, samples were centrifuged at 17,000 g for 15 min at 4°C. The RNA pellet was washed twice with 75% (v/v) ethanol, briefly air-dried for 5 min, and dissolved in diethylpyrocarbonate-treated water. The purity and yield of RNA were determined using a NanoDrop 2000 spectrophotometer (Thermo Scientific). For cDNA synthesis, 1  $\mu$ g total RNA was reverse-transcribed using oligo-dT and the ImProm-II Reverse Transcription System (Promega) according to the manufacturer's instructions. The RT-PCR conditions were one cycle of 25°C for 5 min, 42°C for 60 min, and 72°C for 7 min. For RT-qPCR analysis, each cDNA was diluted 2-fold with nuclease-free water.

### **Quantitative real-time PCR**

The mRNA level of BRCA1 was measured by quantitative real-time PCR using a StepOnePlus Real-Time PCR system (Applied Biosystems) with SYBR Premix Ex Taq (Takara) according to the manufacturer's instructions. The sequences of qPCR primers are shown in Supplementary Table 2. Data were normalized against  $\beta$ -actin expression, and relative expression was calculated using the  $\Delta\Delta$ CT method<sup>16</sup>.

### **Immunofluorescence microscopy**

To detect the subcellular localization of IARS1, transfected HEK293T cells were seeded on LabTek™ 4-well chamber slides (Thermo Fisher Scientific) at a density of  $1 \times 10^4$  cells per well. The following day, cells were fixed with 4% paraformaldehyde diluted in PBS for 20 min at RT and washed four times with washing buffer (PBS containing 0.1% Triton X-100). Cells were blocked in blocking buffer (PBS containing 3% BSA) for 1 hr and then incubated with a mouse anti-Flag antibody (8146S, Cell Signaling, 1:250) diluted in blocking buffer for 2 hr at RT. After four washes, cells were incubated for 1 hr with a goat anti-mouse Alexa Fluor 488-conjugated secondary antibody (Invitrogen) diluted in blocking buffer. Nuclei were stained with mounting medium containing 4',6-diamidino-2-phenylindole (Vector

Laboratories). Images were obtained with a Leica confocal microscope (Leica Biosystems) using an oil immersion objective and excitation wavelengths of 480 and 510 nm.

To analyze Rad51 and  $\gamma$ H2AX focus formation, IARS1-depleted U2OS cells were transferred to LabTek™ 4-well chamber slides at a density of  $7 \times 10^4$  cells per well. They were exposed to ionic radiation using a RS 2000 irradiator (Rad Source) at a dose rate of 10 Gy min<sup>-1</sup>. Cells were pre-extracted with CSK buffer (10 mM PIPES, 100 mM NaCl, 300 mM sucrose, 3 mM MgCl<sub>2</sub>, 1 mM EGTA, and 0.5% Triton X-100) for 10 min on ice and fixed with 4% paraformaldehyde for 20 min at RT. After blocking for 30 min at RT, cells were incubated with the indicated antibodies diluted in blocking buffer overnight at 4°C. Rabbit anti-Rad51 (8875S, Cell Signaling, 1:1,000) and goat anti- $\gamma$ H2AX (05-636, Millipore, 1:1,000) antibodies were used. After three washes with PBS containing 0.05% Triton X-100, cells were incubated with an Alexa Fluor 488-conjugated secondary antibody for 30 min and mounted using ProLong® Gold antifade reagent (Vector Laboratories). Confocal images were acquired with an LSM880 confocal microscope (Carl Zeiss). Image acquisition and analysis were performed with ZEN blue software (Carl Zeiss).

### **Laser microirradiation**

A total of  $3 \times 10^5$  U2OS cells were plated in confocal dishes (SPL), incubated for 1 day, and transfected with 2  $\mu$ g of a GFP-EXO1-expressing plasmid using Lipofectamine 3000 according to the manufacturer's instructions. After 4 hr, media were replaced by media containing 10  $\mu$ M 5-bromo-2'-deoxyuridine. The following day, laser microirradiation was performed using a 355 nm ultraviolet A laser, and cells were incubated in a 37°C chamber containing 5% CO<sub>2</sub>. After each laser microirradiation, images of cells were obtained every 10 sec for 5 min using a LSM880 confocal microscope. The intensity of each laser strip was determined using Zen blue software, and the values were normalized against the baseline values. At least ten cells were used for quantification.

**Supplementary Table 1 Data collection and refinement statistics for GgEARS1–IARS1 and GgEARS1 crystals.**

|                                                     | GgEARS1–IARS1<br>(PDB 7WRS)<br>XFEL | GgEARS1<br>(PDB 7WRU)<br>Synchrotron |
|-----------------------------------------------------|-------------------------------------|--------------------------------------|
| <b>Data collection</b>                              |                                     |                                      |
| Space group                                         | P2 <sub>1</sub> 2 <sub>1</sub> 2    | P2 <sub>1</sub>                      |
| Cell dimensions                                     |                                     |                                      |
| <i>a</i> , <i>b</i> , <i>c</i> (Å)                  | 143.0, 155.5, 44.2                  | 89.0, 41.8, 92.2                     |
| $\alpha$ , $\beta$ , $\gamma$ (°)                   | 90, 90, 90                          | 90, 100, 90                          |
| Wavelength                                          | 1.2782                              | 1.0094                               |
| Resolution (Å)                                      | 77.8-2.4<br>(2.44-2.4)*             | 45.4-2.5<br>(2.54-2.5)*              |
| <i>R</i> <sub>split</sub>                           | 14.38 (64.9)                        |                                      |
| <i>R</i> <sub>merge</sub>                           |                                     | 0.355 (2.656)                        |
| <i>CC</i> <sub>1/2</sub>                            | 0.995 (0.866)                       | 0.976 (0.612)                        |
| <i>I</i> / $\sigma$ <i>I</i>                        | 5.2 (1.8)                           | 8.1 (1.2)                            |
| Completeness (%)                                    | 100.0 (100.0)                       | 98.4 (99.2)                          |
| Redundancy                                          | 622.9 (431.1)                       | 6.5 (6.5)                            |
| <b>Refinement</b>                                   |                                     |                                      |
| Resolution (Å)                                      | 71.5-2.4                            | 45.4-2.5                             |
| No. reflections                                     | 39,660                              | 23,252                               |
| <i>R</i> <sub>work</sub> / <i>R</i> <sub>free</sub> | 19.3 / 24.3                         | 23.2 / 27.4                          |
| No. atoms                                           | 6384                                | 4005                                 |
| Protein                                             | 6358                                | 4000                                 |
| Ligand/ion                                          | 0                                   | 2                                    |
| Water                                               | 26                                  | 3                                    |
| <i>B</i> -factors                                   |                                     |                                      |
| Protein                                             | 57.0                                | 54.5                                 |
| Ligand/ion                                          |                                     | 162.2                                |
| Water                                               | 43.7                                | 37.7                                 |
| R.m.s. deviations                                   |                                     |                                      |
| Bond lengths (Å)                                    | 0.008                               | 0.012                                |
| Bond angles (°)                                     | 0.957                               | 1.14                                 |

Number of crystals used for XFEL GgEARS1–IARS1 structure –  $2 \times 10^7$ , for GgEARS1 – a single.

\*Values in parentheses are for highest-resolution shell.

**Supplementary Table 2 Sequence of qPCR primers and probes used in this study.**

|                |            |                                        |
|----------------|------------|----------------------------------------|
| BRCA1          | Primer FW  | TCAAACCTGCATGTGGAGCC                   |
|                | Primer REV | ACACAGGGGATCAGCATTCA                   |
| $\beta$ -actin | Primer FW  | ACACCCCAGCCATGTACGTAGCC                |
|                | Primer REV | AAGAGCCTCAGGGCAACGGAACC                |
| DSB1-335 bp    | Primer FW  | GAATCGGATGTATGCGACTGATC                |
|                | Primer REV | TTCCAAAGTTATTCCAACCCGAT                |
|                | Probe      | 6FAM-CACAGCTTGCCCATCCTTGCAAACC-TAMRA   |
| DSB1-1618 bp   | Primer FW  | TGAGGAGGTGACATTAGAACTCAGA              |
|                | Primer REV | AGGACTCACTTACACGGCCTTT                 |
|                | Probe      | 6FAM-TTGCAAGGCTGCTTCCTTACCATTCAA-TAMRA |
| DSB1-3500 bp   | Primer FW  | TCCTAGCCAGATAATAATAGCTATACAAACA        |
|                | Primer REV | TGAATAGACAGACAACAGATAAATGAGACA         |
|                | Probe      | 6FAM-ACCCTGATCAGCCTTCCATGGGTAAAG-TAMRA |
| No DSB         | Primer FW  | ATTGGGTATCTGCGTCTAGTGAGG               |
|                | Primer REV | GACTCAATTACATCCCTGCAGCT                |
|                | Probe      | 6FAM-TCTCTGCACAGACCGGCTTCCCTTC-TAMRA   |

**Supplementary References**

1. Nureki, O. et al. Structure of an archaeal non-discriminating glutamyl-tRNA synthetase: a missing link in the evolution of Gln-tRNA<sup>Gln</sup> formation. *Nucleic Acids Res.* **38**, 7286–7297 (2010).
2. Fu, Y. et al. Structure of the ArgRS-GlnRS-AIMP1 complex and its implications for mammalian translation. *Proc. Natl. Acad. Sci. USA* **111**, 15084–15089 (2014).
3. Rath, V. L. et al. How glutamyl-tRNA synthetase selects glutamine. *Structure* **6**, 439–449 (1998).

4. Menges, C.W. et al. FAS-associated factor 1 (FAF1): diverse functions and implications for oncogenesis. *Cell Cycle* **15**, 2528-2534 (2009).
5. Otwinowski, Z. and Minor, W. Processing of X-ray diffraction data collected in oscillation mode. *Methods Enzymol.* **276**, 307–326 (1997).
6. McCoy, A. J. et al. Phaser crystallographic software. *J. Appl. Crystallogr.* **40**, 658–674 (2007).
7. Adams, P.D. et al. PHENIX: a comprehensive Python-based system for macromolecular structure solution. *Acta Crystallogr. D Biol. Crystallogr.* **66**, 213–221 (2010).
8. Emsley, P. & Cowtan, K. Coot: model-building tools for molecular graphics. *Acta Crystallogr. D Biol. Crystallogr.* **60**, 2126–2132 (2004).
9. Park, J. et al. Current status of the CXI beamline at the PAL-XFEL. *J. Korean Phys. Soc.* **69**, 1089–1093 (2016).
10. Kang, H.S. et al. Hard X-ray free-electron laser with femtosecond-scale timing jitter. *Nat. Photonics* **11**, 708–713 (2017).
11. Kim, J. et al. Focusing X-ray free-electron laser pulses using Kirkpatrick-Baez mirrors at the NCI hutch of the PAL-XFEL. *J. Synchrotron Radiat.* **25**, 289–292 (2018).
12. Mariani, V. et al. *OnDA*: online data analysis and feedback for serial X-ray imaging. *J. Appl. Crystallogr.* **49**, 1073–1080 (2016).
13. Barty, A. et al. *Cheetah*: software for high-throughput reduction and analysis of serial femtosecond X-ray diffraction data. *J. Appl. Crystallogr.* **47**, 1118–1131 (2014).
14. White, T.A. et al. CrystFEL: a software suite for snapshot serial crystallography. *J. Appl. Crystallogr.* **45**, 335–341 (2012).
15. Battye, T.G.G. et al. IMosflm: a new graphical interface for diffraction-image processing with MOSFLM. *Acta Cryst.* **D67**, 271-281 (2011).
16. Livak, K.J. and Schmittgen, T.D. Analysis of relative gene expression data using real-time quantitative PCR and the 2(-Delta Delta C(T)) Method. *Methods* **25**, 402-408 (2001).
